# Supplementary material for: Antiproliferative Activity of Krukovine by Regulating Transmembrane Protein 139 (TMEM139) in Oxaliplatin-Resistant Pancreatic Cancer Cells
Source: MDPI journal article supplement (doi:10.3390/cancers15092642), 2023-05-07
Supplement: s1 [file s1]

# Supplementary Figure S1

a

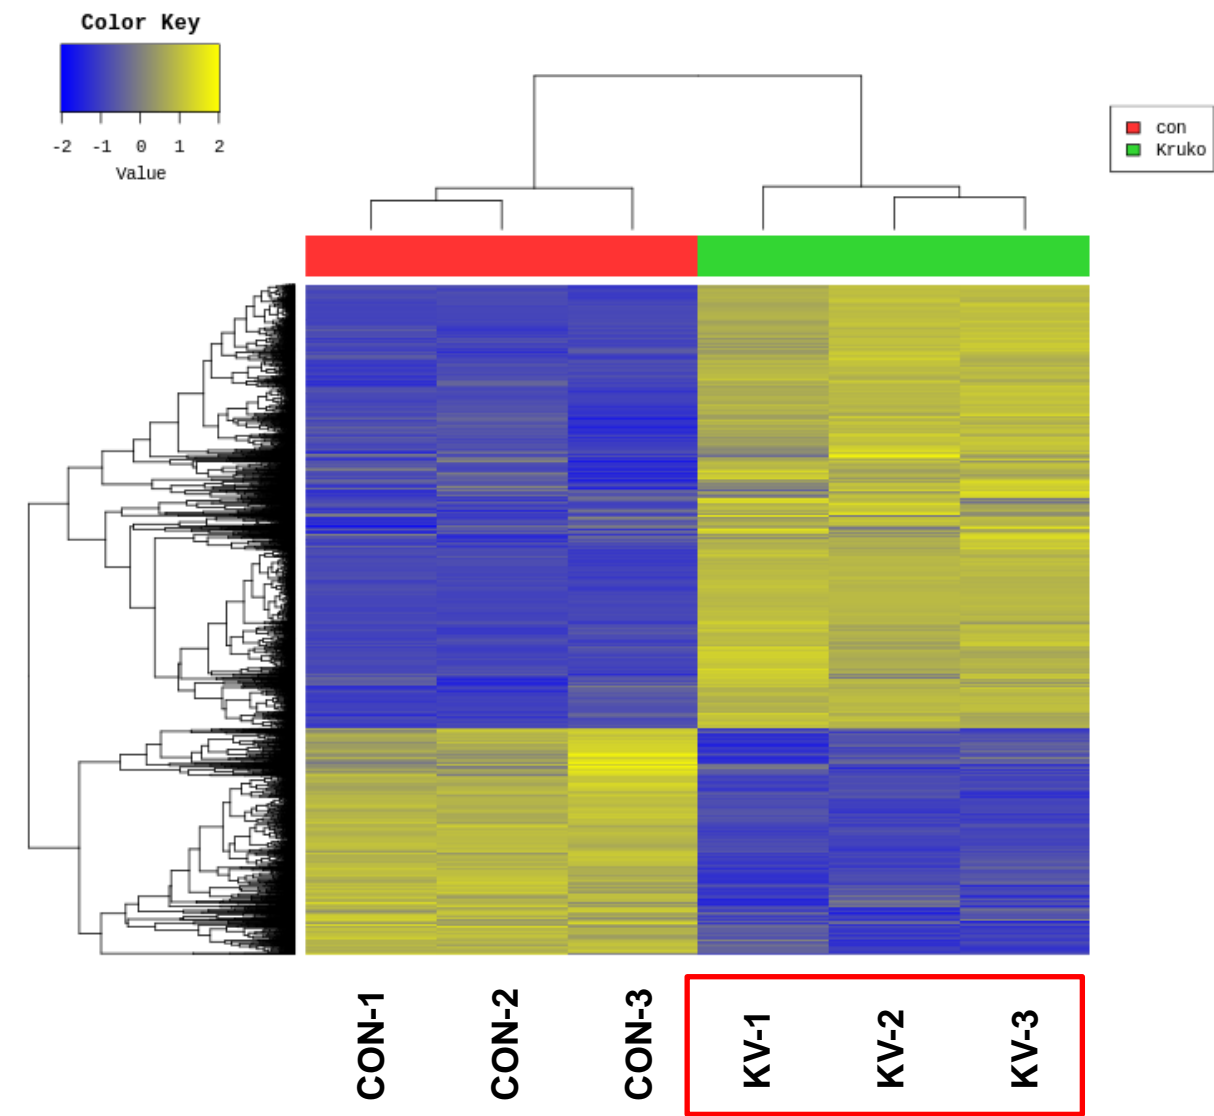

RNA-sequencing data (oxaliplatin-resistant AsPC-1 cells were treated with KV (25  $\mu$ M) for 48 h. Heatmap of one-way hierarchical clustering using z-score ( $-2 \leq z \leq 2$ ) for normalized value (log2 based) (4,269 genes satisfying with fc 2 & raw.p)  
All data represent at least three independent experiments.

b

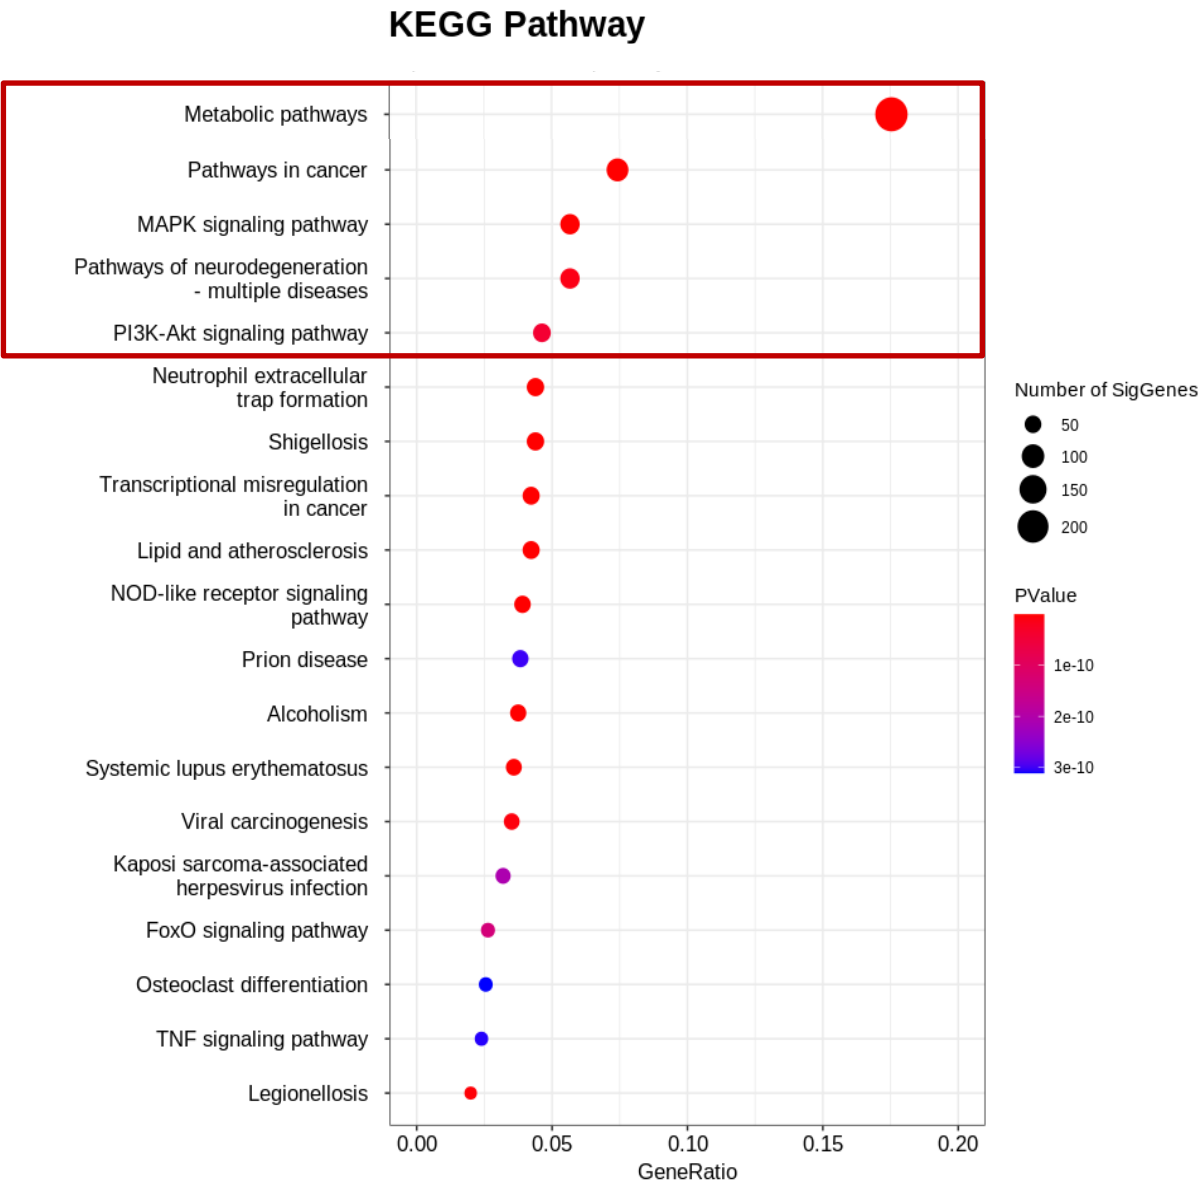

Top 19 terms of KEGG pathway. The dot color represents the p-values. The scale of the spots indicates the number of genes involved.

# Supplementary Figure S2

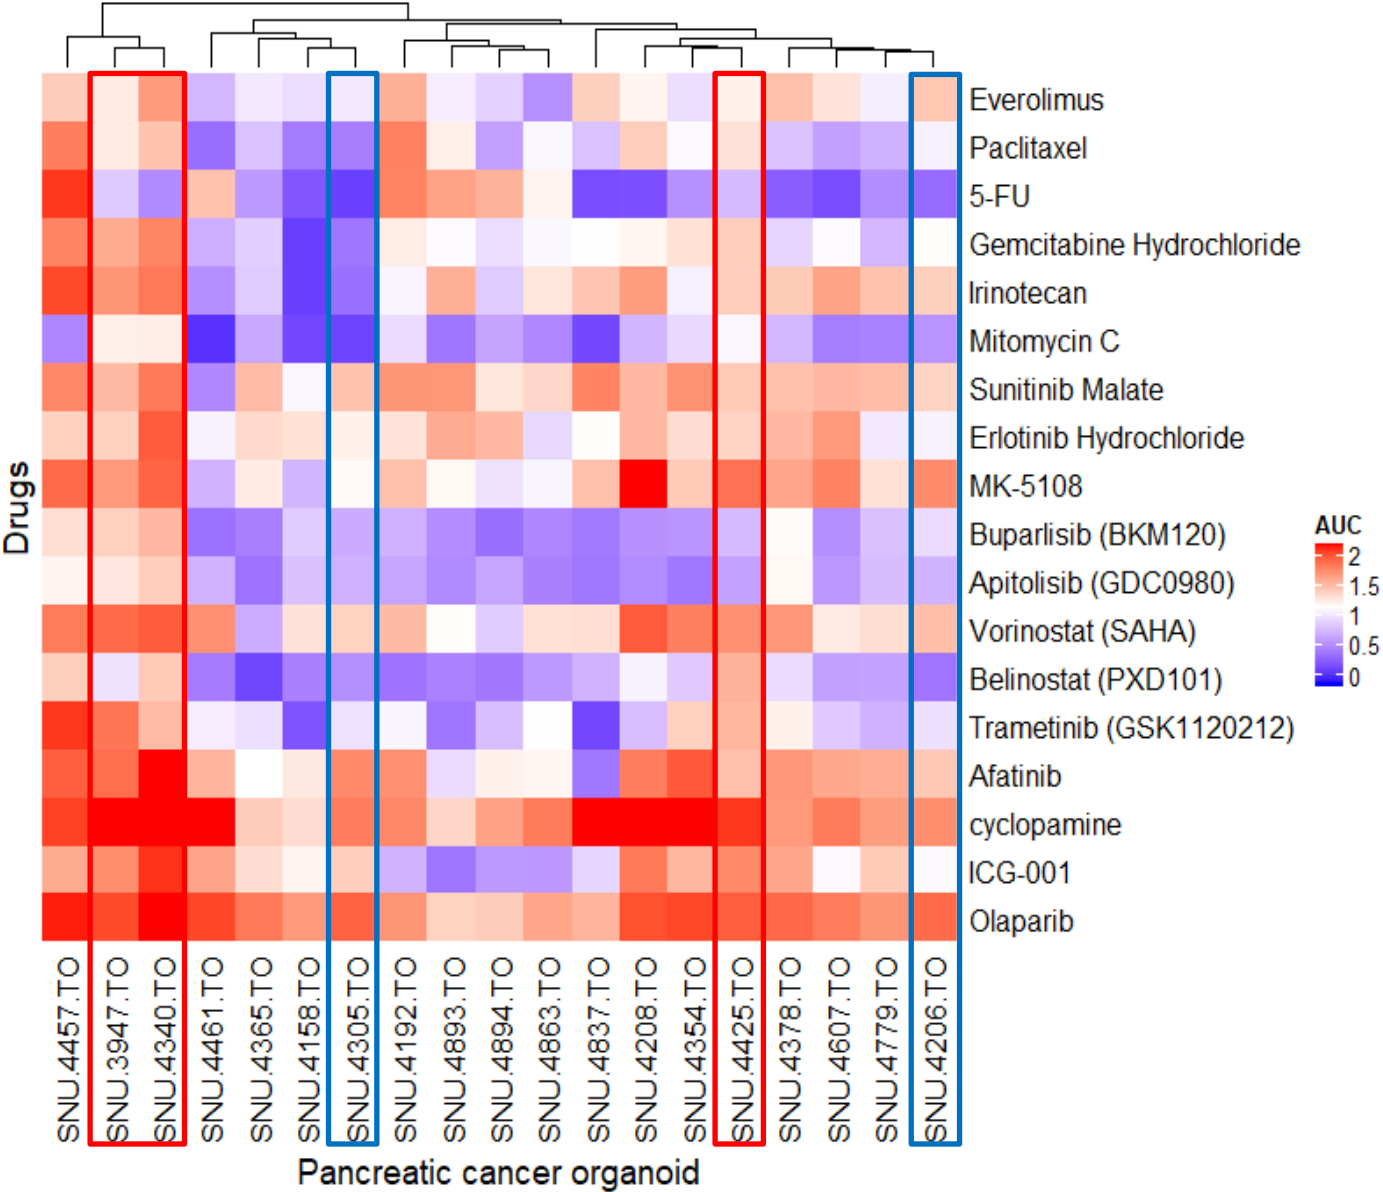

Multi-drug response heatmap, multi-drug response on PDPCOs
